# Supplementary material
Source: Springer Nature journal article supplement (https://www.springermedizin.de/resource/supplementary/12879_2009_1153_MOESM4_ESM.pdf/9441970)

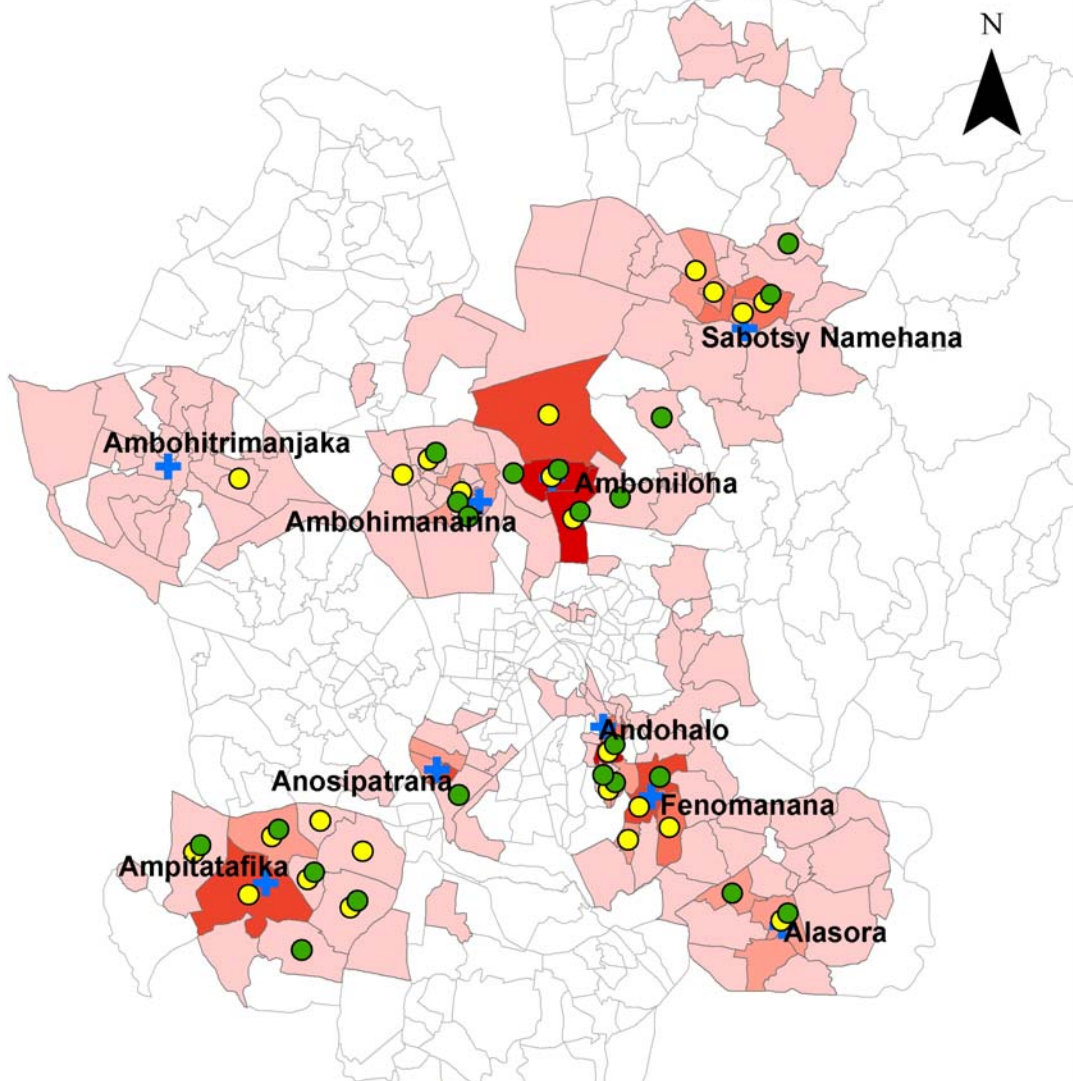

- Confirmed malaria cases with travel report
- Confirmed malaria cases without travel report
- + Health centres

**Neighbourhoods with presumed malaria cases**

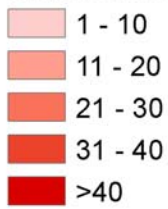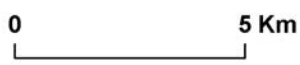

Supplement: MOESM4 [file 9441970]
